# Supplementary material for: Assessing informed consent practices during normal vaginal delivery and immediate postpartum care in tertiary-level hospitals of Bangladesh
Source: PubMed Central journal article supplement (PMC7839100; doi:10.18332/ejm/109311), 2019-05-21
Supplement: EJM-3-10-s1.pdf [file EJM-3-10-s1.pdf]

**Supplementary Table 2: Questionnaire in English**

*Informed Consent Practices during Normal Vaginal Delivery and immediate postpartum care  
(within first 24 hours of delivery) in the tertiary level hospital setting, Dhaka, Bangladesh  
Questionnaire for mothers*

**Code no:** .....

Dear Respondent,

*That all information is confidential and will be used for RESEARCH purposes only*

What is the question about?

The question is to assess informed consent practices during normal vaginal delivery and immediate postpartum care (within first 24 hours of delivery) in the tertiary level hospital setting, Dhaka, Bangladesh.

| <b>NO</b> | <b>QUESTIONS</b>                                 | <b>CODING CATEGORIES</b>                                                               |
|-----------|--------------------------------------------------|----------------------------------------------------------------------------------------|
| <b>I.</b> | <b>Basic Information:</b>                        |                                                                                        |
| 01        | Date of Interview                                | _____<br>—                                                                             |
| 02        | Place of Interview:                              | 0. DMC<br>1. SSMC                                                                      |
| 03        | Time of Interview:                               | _____<br>_____                                                                         |
| 04        | Time since Delivery:                             | _____<br>—                                                                             |
| 05        | Delivery type                                    | 0. Spontaneous vaginal delivery<br>1. Assisted vaginal delivery                        |
| 06        | Place of Delivery                                | _____                                                                                  |
| <b>II</b> | <b>Mothers Socio-Demographic Characteristics</b> |                                                                                        |
| 07        | Woman's age in years:                            | _____<br>—                                                                             |
| 08        | Mother Education                                 | 0. No education<br>1. Signature only<br>2. Primary education<br>3. Secondary and above |
| 09        | Mother employment status                         | 0. Government<br>1. Private                                                            |

| NO         | QUESTIONS                                                                                                           | CODING CATEGORIES                                            |                     |
|------------|---------------------------------------------------------------------------------------------------------------------|--------------------------------------------------------------|---------------------|
|            |                                                                                                                     | 2. Household work                                            |                     |
| 10         | Monthly household income                                                                                            | 0. Less than 5000TK<br>1. 5001-10000TK<br>2. Above 10000TK   |                     |
| 11         | Religion                                                                                                            | 0. Muslim 1. Hindu<br>2. Christian 3. Others                 |                     |
| 12         | Living place                                                                                                        | 0. Rural 1. Urban 2. Peri urban                              |                     |
| 13         | No. of total child birth including the current delivery (Total child birth= term +preterm + abortion + live births) | -----<br>-                                                   |                     |
| <b>III</b> | <b>Informed Consent Questions</b>                                                                                   |                                                              |                     |
| 14         | Was consent taken by the service providers before proceeding NVD?                                                   | 0. Yes 1. No<br>(If 'no' skip Q-15 & Q-16)                   |                     |
| 15.        | What type of consent was taken?                                                                                     | 0. Written 1. Verbal                                         |                     |
| 16         | Who gave the consent/assent?                                                                                        | 0. Patient herself<br>1. Family members 2. Relatives         |                     |
| 17         | Did the service provider introduce him/herself before proceeding services?                                          | 0. Yes 1. No                                                 |                     |
| 18         | Did the service providers allow you to ask any question regarding the services they provided?                       | 0. Yes 1. No                                                 |                     |
| 19         | Did the service providers explain and share the medication they provided to you?                                    | 0. Yes 1. No 2. N/A                                          |                     |
| 20         | After delivery, were you asked by service providers for consent before proceeding?                                  | 20.1 Abdominal exam                                          | 0. Yes 1. No 2. N/A |
|            |                                                                                                                     | 20.2. Breast exam                                            | 0. Yes 1. No 2. N/A |
|            |                                                                                                                     | 20.3. Any injection                                          | 0. Yes 1. No 2. N/A |
|            |                                                                                                                     | 20.4. Anemia cyanosis                                        | 0. Yes 1. No 2. N/A |
|            |                                                                                                                     | 20.5. Pulse measurement                                      | 0. Yes 1. No 2. N/A |
|            |                                                                                                                     | 20.6. BP measurement                                         | 0. Yes 1. No 2. N/A |
|            |                                                                                                                     | 20.7. Vaginal examination                                    | 0. Yes 1. No 2. N/A |
|            |                                                                                                                     | 20.8. Blood transfusion                                      | 0. Yes 1. No 2. N/A |
| 21         | Which of the following issues of NVD explained during consent taking?                                               | 0. Purpose 1. Benefits<br>2. Success rate 3. Potential risks |                     |

| NO | QUESTIONS                                                                                                                                   | CODING CATEGORIES |
|----|---------------------------------------------------------------------------------------------------------------------------------------------|-------------------|
| 22 | If they asked for consent for a procedure, did they ask every time they do it?/ Did they ask for consent every time for the same procedure? | 0. Yes 1.No 2.N/A |
| 23 | If consent is written, have they documented the signed consent in the patient record file?                                                  | 0. Yes 1.No       |

Any other comments?

\_\_\_\_\_  
 Interviewer's Name: \_\_\_\_\_ DATE \_\_\_\_ / \_\_\_\_ / \_\_\_\_

Signature \_\_\_\_\_
